# Supplementary material for: Single-cell RNA-Seq of human esophageal epithelium in homeostasis and allergic inflammation
Source: JCI journal article supplement (doi:10.1172/jci.insight.159093), 2022-04-26

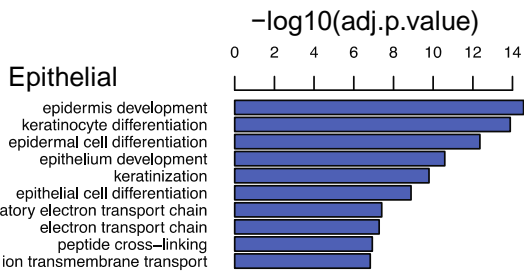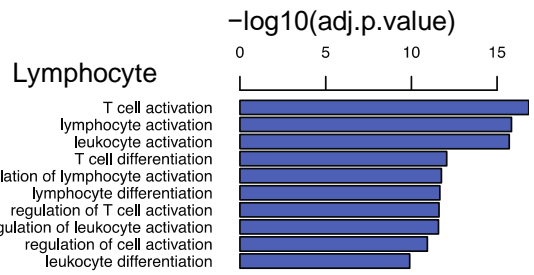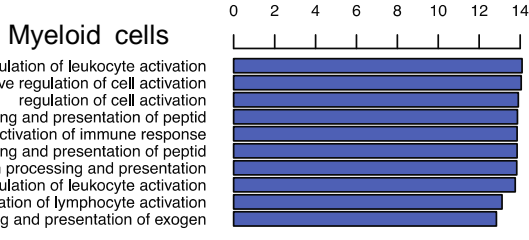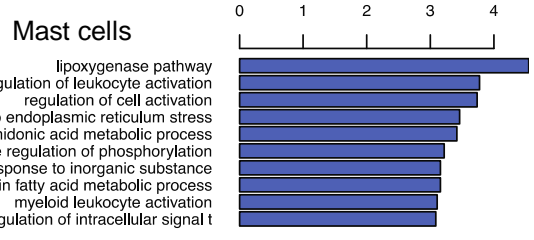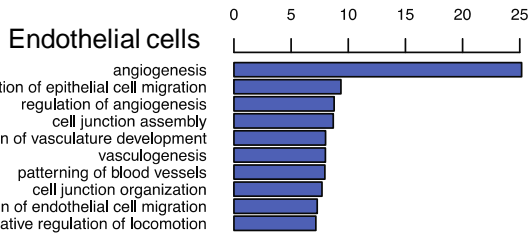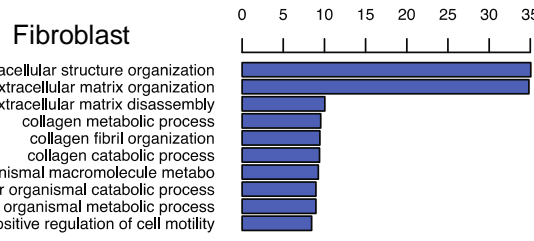

Supplemental Figure 1

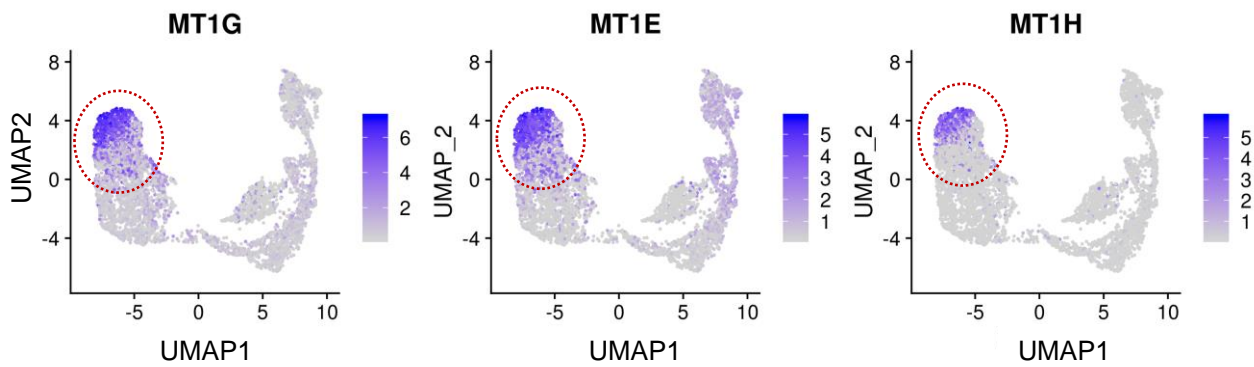

Supplemental Figure 2

A

**Gene Ontology**

PDPN<sup>high</sup> (basal)

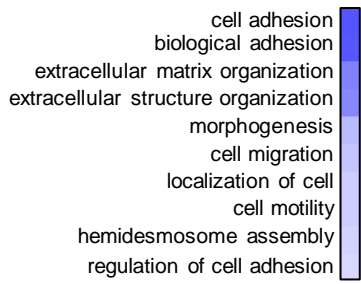

PDPN<sup>low</sup> (suprabasal)

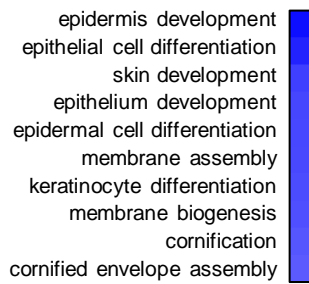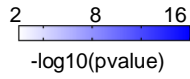

B

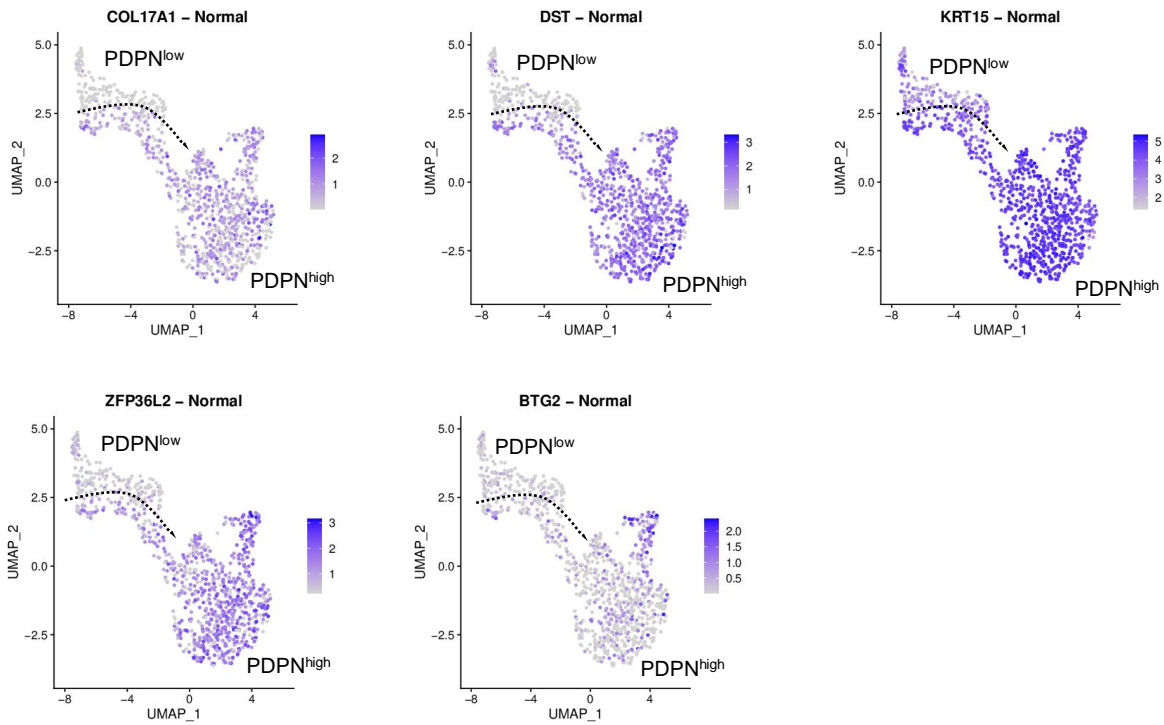

Supplemental Figure 3

**A**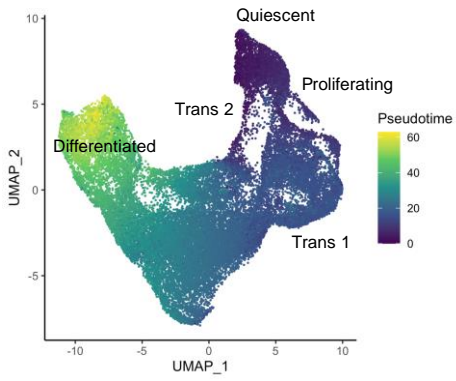**B**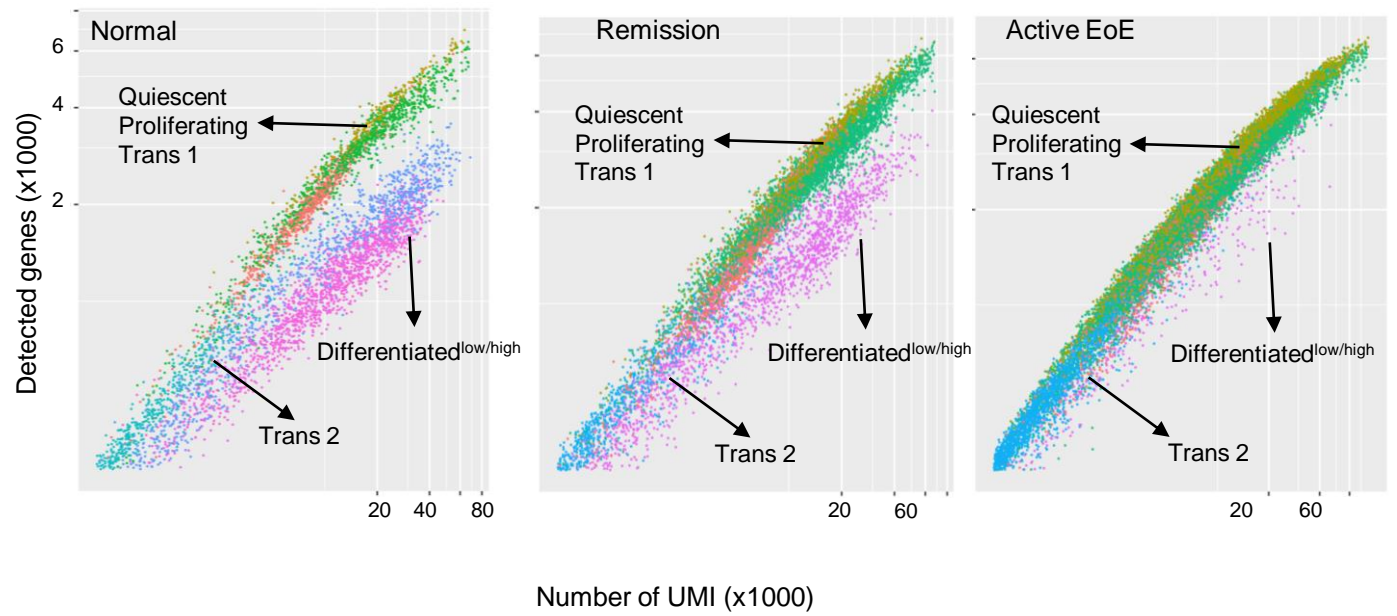

Supplemental Figure 4

A

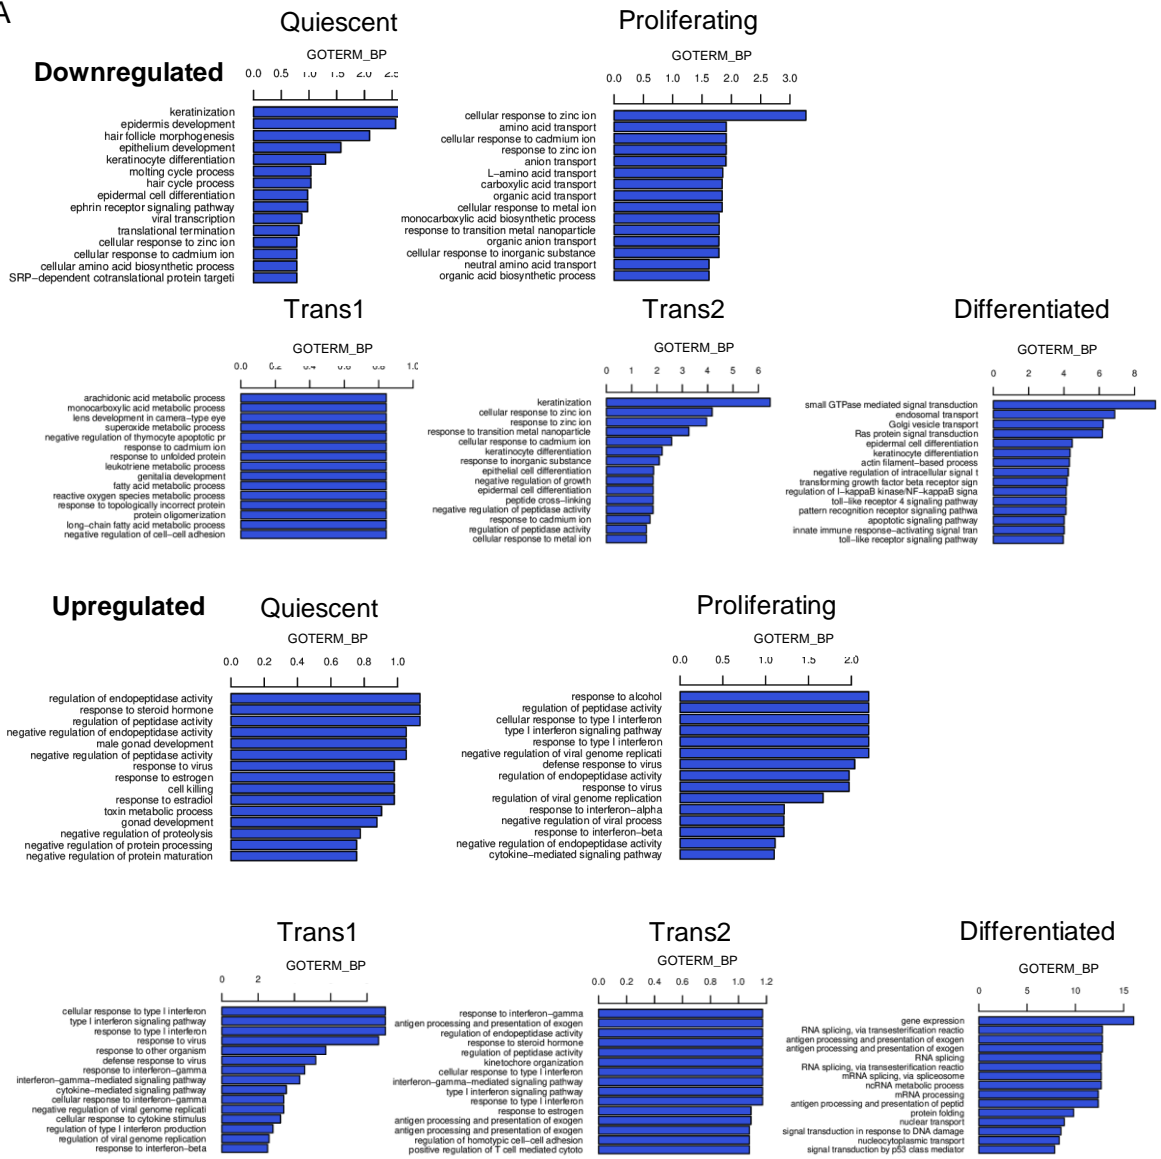

B

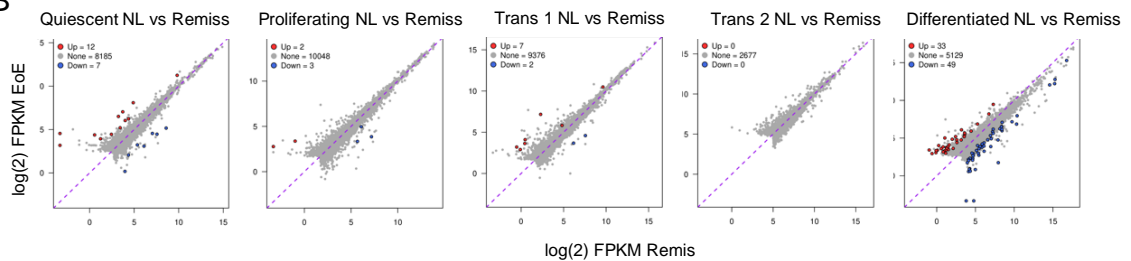

Supplemental Figure 5

A

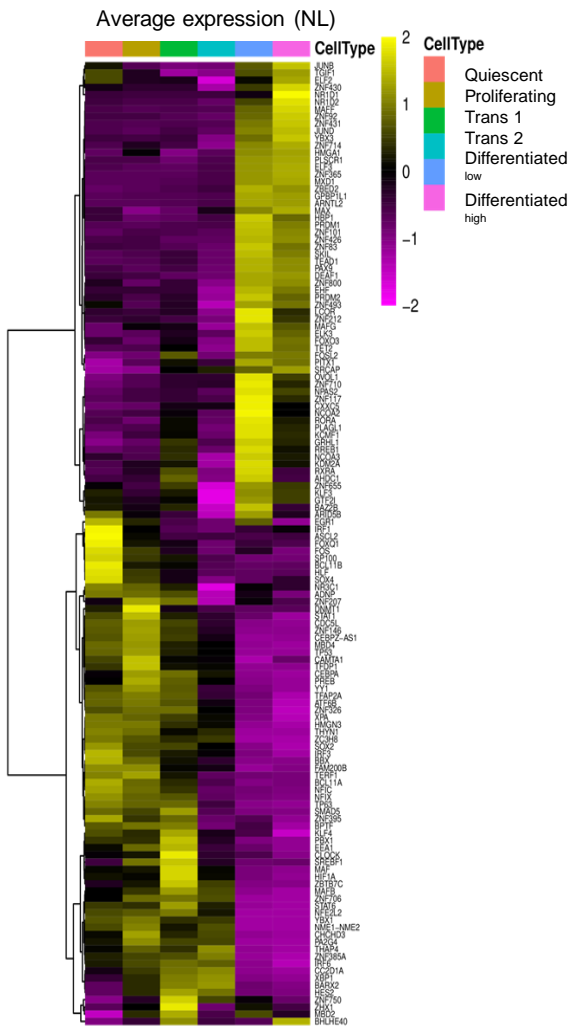

Transcriptional change over NL (log(2) FC)

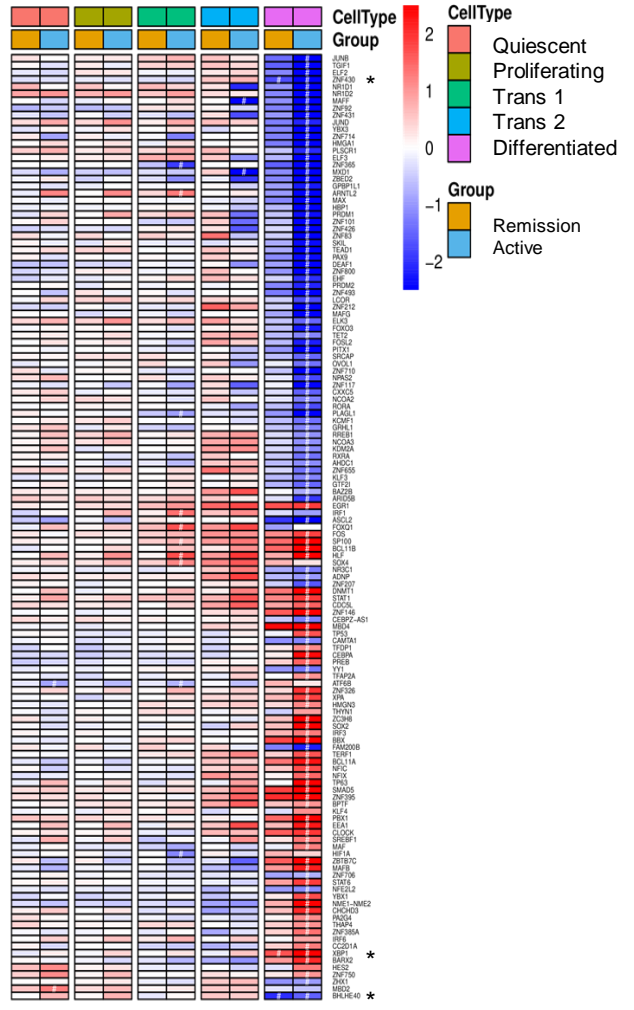

B

Downregulated

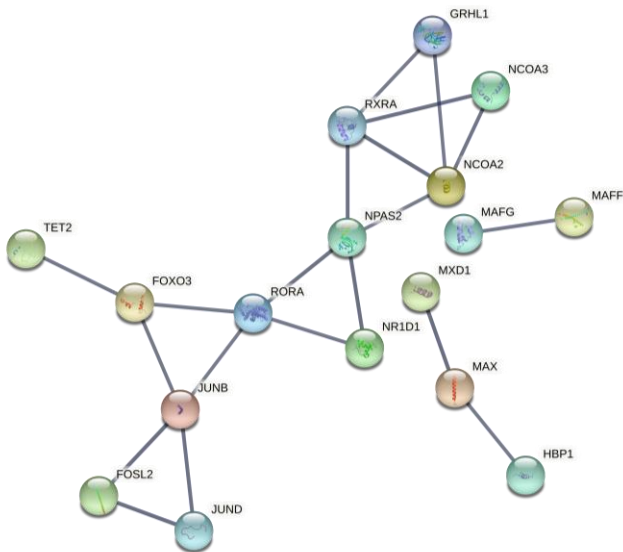

C

Upregulated

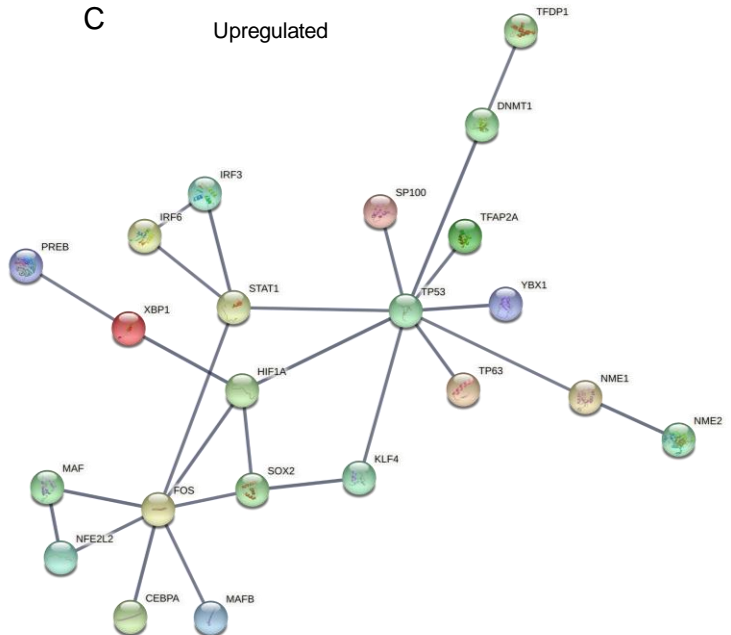

**GWAS**  
**N=52**

**A**

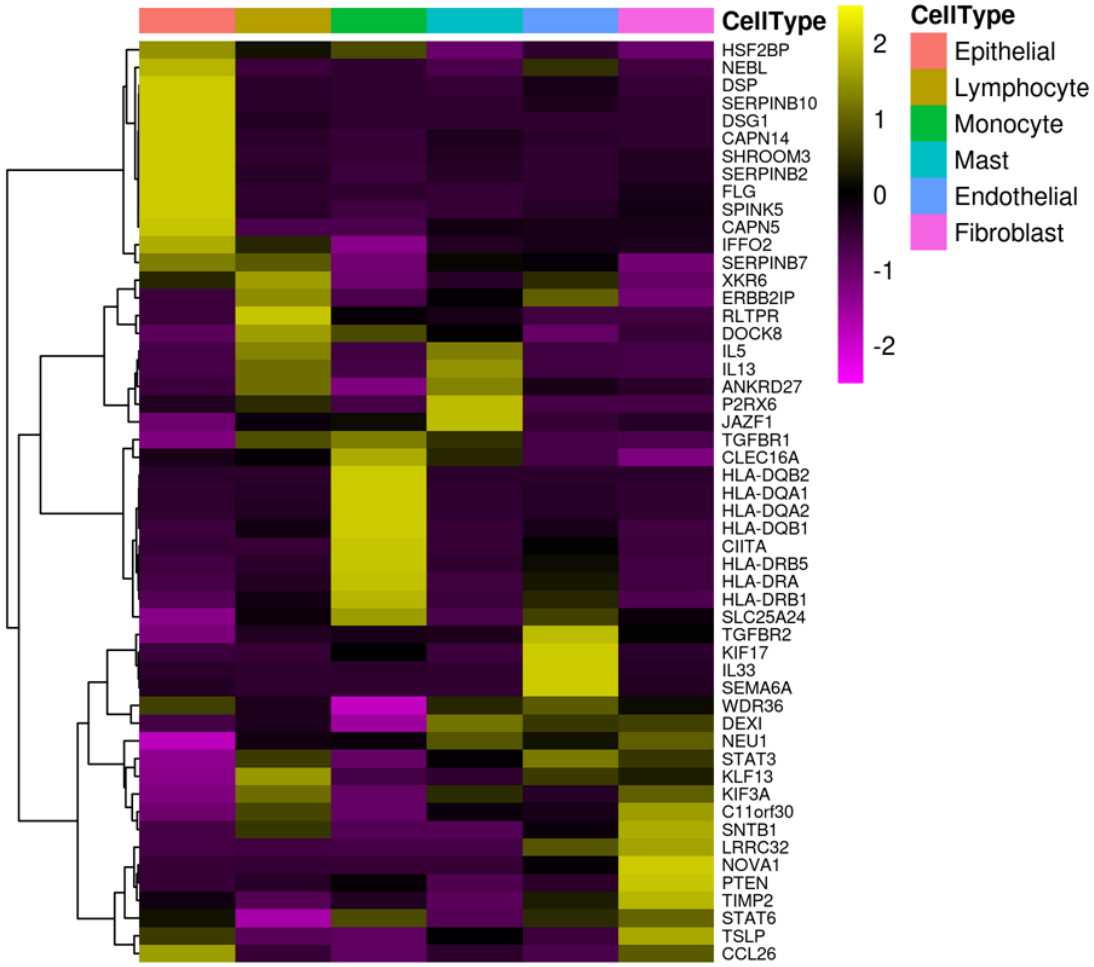

**B**

Expression of GWAS-associated epithelial genes in bulk RNA sequencing

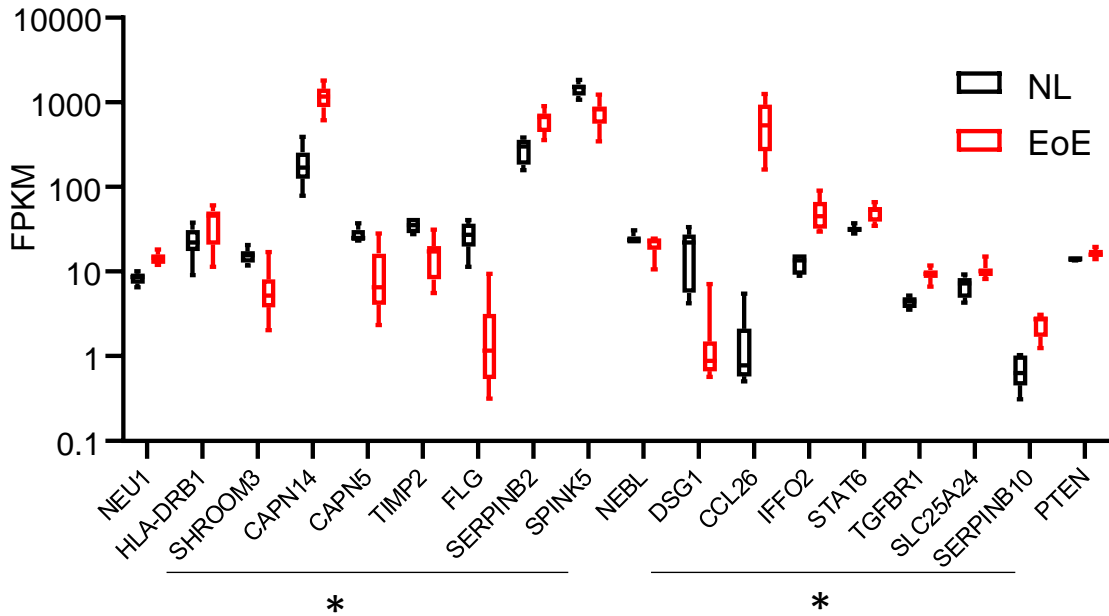

Supplement: sd1 [file 1]
